# Supplementary material for: Quality of Life in Children with Primary Antibody Deficiency
Source: PubMed Central journal article supplement (PMC4165866; doi:10.1007/s10875-014-0072-x), 2014-07-09
Supplement: 10875_2014_72_MOESM1_ESM.pdf [file 10875_2014_72_MOESM1_ESM.pdf]

## Online resource 1

### Quality of Life in Children with Primary Antibody Deficiency

Journal of Clinical Immunology

Titman P<sup>1</sup>, Allwood Z<sup>1</sup>, Gilmour C<sup>1</sup>, Malcolmson C<sup>1</sup>, Duran-Persson C<sup>1</sup>, Cale C<sup>1</sup>, Davies G<sup>1</sup>, Gaspar H<sup>2</sup>, Jones A<sup>1</sup>

<sup>1</sup> Great Ormond Street Hospital for Children, London

<sup>2</sup> Institute of Child Health, University College London

Corresponding author email: [alison.jones@gosh.nhs.uk](mailto:alison.jones@gosh.nhs.uk)

**Caption:      Illness severity scale for children affected by Primary Antibody Deficiency disorders**

| Severity score | Duration of disorder | Complications |
|----------------|----------------------|---------------|
| 1              | Not lifelong         | No            |
| 2              | Not lifelong         | Yes           |
| 3              | Lifelong             | No            |
| 4              | Lifelong             | Early         |
| 5              | Lifelong             | Established   |
